# Supplementary material for: A Risk Prediction Model for the Assessment and Triage of Women with Hypertensive Disorders of Pregnancy in Low-Resourced Settings: The miniPIERS (Pre-eclampsia Integrated Estimate of RiSk) Multi-country Prospective Cohort Study
Source: PLoS Med. 2014 Jan 21;11(1):e1001589. doi: 10.1371/journal.pmed.1001589 (PMC3897359; doi:10.1371/journal.pmed.1001589)
Supplement: Dataset S1 — Data file containing predicted probability calculated by the miniPIERS model and observed outcome for all cases in the miniPIERS and fullPIERS cohorts. (XLSX) [file pmed.1001589.s001.xlsx]

## Sheet: fullPIERS PLOS data
outcomein48hrs	xb	prob	cohort
0	-2.60772	0.0688446	1
0	-0.988596	0.271811	1
0	-2.86286	0.054181	1
0	-3.14288	0.0414976	1
0	-1.23853	0.22524	1
0	-3.21806	0.0386081	1
0	-2.77048	0.0591151	1
1	-0.0057365	0.499352	1
0	-3.02851	0.0462929	1
0	-3.2151	0.0387184	1
0	-2.16275	0.103437	1
0	-2.51008	0.0753736	1
0	-3.07374	0.0443365	1
0	-2.31805	0.089896	1
0	-3.19528	0.0394626	1
1	-0.997733	0.270006	1
0	-2.64755	0.0663344	1
0	-1.36396	0.204108	1
0	-2.25334	0.0953325	1
0	-3.14914	0.0412492	1
0	-1.62975	0.164296	1
0	-2.82343	0.0562377	1
0	-3.24792	0.0375151	1
0	-1.83479	0.138043	1
0	-2.06827	0.112533	1
0	-1.04549	0.260697	1
0	-3.59436	0.0268253	1
0	-2.20479	0.0996029	1
0	-1.88782	0.131853	1
0	-2.78292	0.0584271	1
0	-3.28328	0.0362589	1
0	-1.00775	0.268035	1
0	-3.12965	0.0420272	1
0	-2.73065	0.0613697	1
0	-2.02542	0.116884	1
0	-2.62006	0.0680573	1
0	-3.66387	0.0250691	1
1	-2.05593	0.113771	1
0	-0.979995	0.273517	1
0	-2.56067	0.0719224	1
0	-2.7363	0.061045	1
1	0.270778	0.568055	1
0	-2.54544	0.0729459	1
0	-3.17079	0.0404016	1
0	-3.17575	0.0402097	1
0	-3.58782	0.0269965	1
0	-3.02492	0.0464519	1
0	-2.62389	0.0678148	1
0	-3.15969	0.040834	1
0	-3.03409	0.0460472	1
0	-1.41907	0.195301	1
0	-2.05629	0.113735	1
0	-3.06322	0.0447843	1
0	-2.73923	0.0608774	1
0	0.0493345	0.513116	1
1	-0.652689	0.343092	1
0	-3.58106	0.0271747	1
0	-2.2565	0.0950604	1
0	-0.0190894	0.496013	1
0	-2.31639	0.0900315	1
0	-2.61909	0.0681193	1
0	-1.81231	0.140738	1
0	-2.03206	0.1162	1
0	-2.45124	0.079578	1
0	-1.29044	0.216311	1
1	-1.37266	0.202699	1
1	-3.36717	0.0334389	1
0	-3.47739	0.0300539	1
0	-1.94225	0.125746	1
0	-2.31563	0.0900942	1
0	-3.16604	0.0405861	1
0	-1.65869	0.16036	1
0	-2.81505	0.0566841	1
0	-2.18924	0.101006	1
0	-1.94271	0.125695	1
0	-3.16185	0.0407495	1
1	0.159153	0.540485	1
0	-3.35804	0.0337351	1
0	-2.03838	0.115553	1
0	-3.03474	0.0460188	1
0	-2.39925	0.08347	1
1	-0.220771	0.445807	1
0	-2.82161	0.0563344	1
0	-2.65984	0.0655776	1
0	-2.11722	0.107736	1
0	-2.75522	0.0599692	1
1	-1.4535	0.189947	1
0	-2.9722	0.0488434	1
0	-3.41276	0.0319961	1
0	-1.56882	0.172834	1
0	-3.11663	0.0425543	1
0	-3.28643	0.0361491	1
0	-0.519686	0.373661	1
0	-3.01853	0.0467357	1
0	-2.79252	0.0579007	1
0	-2.68942	0.0637877	1
0	-3.2674	0.036818	1
1	-1.37077	0.203003	1
0	-3.14598	0.0413743	1
0	-2.77061	0.0591079	1
0	-1.84029	0.137389	1
0	-3.17128	0.0403826	1
0	-2.99567	0.0477646	1
0	-1.80721	0.141356	1
0	-2.85289	0.0546946	1
0	-3.01079	0.0470816	1
0	-2.44129	0.0803097	1
0	-2.48891	0.0768617	1
1	-0.909255	0.287796	1
0	-2.78538	0.0582919	1
0	-2.54974	0.0726557	1
0	-2.73765	0.0609676	1
0	-2.84716	0.0549911	1
1	-1.95393	0.124467	1
0	-2.74731	0.0604167	1
0	-2.53676	0.073535	1
0	-1.5682	0.172922	1
0	-2.69685	0.0633454	1
1	-1.0681	0.256363	1
0	-3.13003	0.0420116	1
0	-1.22636	0.22737	1
0	-1.66783	0.159133	1
0	-2.79955	0.0575185	1
0	-2.34145	0.088	1
0	-2.02951	0.116462	1
0	-2.63889	0.066873	1
0	-2.85676	0.0544947	1
0	-2.22194	0.0980753	1
0	-3.11221	0.042735	1
1	-2.16676	0.103066	1
0	-3.47622	0.0300879	1
0	-3.45091	0.0308355	1
0	-1.3963	0.198904	1
0	-2.73456	0.0611449	1
0	-2.83094	0.0558403	1
0	-0.279586	0.431326	1
0	-3.18516	0.0398479	1
0	-2.8287	0.0559588	1
0	-2.83952	0.0553899	1
1	-2.99916	0.0476061	1
0	-1.56903	0.172804	1
0	-3.97447	0.0184997	1
0	-3.37991	0.0330295	1
0	-1.84488	0.136845	1
0	-2.85544	0.0545627	1
1	-1.52434	0.179285	1
0	-1.70042	0.154821	1
0	-2.95506	0.0496461	1
0	-2.53495	0.073658	1
0	-3.45139	0.0308213	1
0	-1.46047	0.188877	1
0	-2.35161	0.0871873	1
0	-3.49294	0.0296039	1
0	-1.23157	0.226456	1
0	-2.79758	0.0576257	1
0	-2.02934	0.116479	1
0	-1.94774	0.125144	1
0	-3.33938	0.0343487	1
0	-2.5495	0.0726717	1
0	-1.85141	0.136077	1
0	-2.61471	0.0683973	1
1	-2.20481	0.0996009	1
0	-3.79498	0.0220567	1
0	-2.85488	0.0545915	1
0	-1.77337	0.145514	1
0	-2.82406	0.0562042	1
0	-3.26371	0.0369491	1
0	-1.7851	0.144062	1
0	-3.03085	0.0461897	1
0	-2.80949	0.0569824	1
0	-1.40616	0.197337	1
0	-2.69685	0.0633454	1
1	-2.3665	0.0860102	1
0	-2.40285	0.083195	1
0	-2.26448	0.0943764	1
0	-1.73997	0.149717	1
0	-2.70335	0.0629614	1
0	-1.90961	0.129378	1
0	-0.319456	0.421574	1
0	-3.02261	0.0465541	1
0	-1.1348	0.243856	1
0	-2.89493	0.0525609	1
0	-3.03621	0.0459543	1
0	-3.23365	0.0380336	1
1	-3.01121	0.0470627	1
0	-1.39545	0.199039	1
0	-2.92456	0.0511047	1
0	-2.45529	0.0792819	1
0	-1.57025	0.172629	1
0	-2.86507	0.054068	1
0	-2.23372	0.097038	1
0	-2.426	0.081446	1
0	-2.37602	0.0852648	1
1	-1.70148	0.154683	1
0	-3.2109	0.0388747	1
0	-2.54932	0.0726836	1
0	-1.97013	0.122713	1
0	-2.77671	0.0587696	1
0	-3.1128	0.0427105	1
0	-0.630619	0.348083	1
0	-3.02596	0.0464059	1
0	-1.7657	0.14647	1
0	-1.92494	0.127662	1
1	-3.0255	0.0464259	1
0	-0.661797	0.341042	1
0	-3.4619	0.0305088	1
0	-3.71662	0.0238116	1
0	-2.2661	0.0942376	1
0	-3.21789	0.0386144	1
0	-3.13442	0.0418354	1
0	-1.80953	0.141075	1
0	-3.10353	0.0430911	1
0	-2.74583	0.0605012	1
0	-1.92494	0.127662	1
0	-3.0118	0.0470365	1
1	-3.59694	0.0267581	1
0	-1.61389	0.166485	1
0	-3.20694	0.039023	1
0	-1.58014	0.17122	1
0	0.414439	0.602904	1
0	-2.83538	0.0556067	1
0	-2.88093	0.0532628	1
0	-1.20476	0.231188	1
0	-1.62934	0.164352	1
1	-1.99683	0.119868	1
0	-3.51289	0.0290361	1
0	-2.42661	0.0814004	1
1	0.114503	0.529378	1
0	-2.86479	0.0540823	1
0	-2.46451	0.0786111	1
0	-0.9229	0.285007	1
0	-1.71551	0.152858	1
0	-2.42366	0.0816215	1
0	-3.53904	0.0283079	1
1	-1.45939	0.189042	1
1	-2.03662	0.115732	1
0	-3.6793	0.0246947	1
0	-2.50975	0.0753965	1
1	-0.729765	0.325936	1
1	-2.37391	0.085429	1
0	-3.30791	0.0354079	1
0	-1.70202	0.154612	1
0	-2.76659	0.0593317	1
0	-3.15102	0.041175	1
0	-2.66792	0.0650843	1
0	-2.87227	0.0537008	1
0	-1.88036	0.132709	1
0	-3.59756	0.026742	1
0	-2.09163	0.110221	1
0	-0.370962	0.409068	1
0	-3.00927	0.0471497	1
0	-3.02193	0.0465842	1
0	-2.10245	0.109164	1
0	-2.74064	0.0607966	1
0	-3.36003	0.0336704	1
0	-1.55364	0.175014	1
0	-3.02376	0.0465029	1
0	-1.00778	0.26803	1
0	-3.13121	0.0419644	1
0	-2.88952	0.0528312	1
0	-1.23673	0.225554	1
1	-1.55486	0.174838	1
1	-2.04397	0.114982	1
0	-2.14753	0.104856	1
0	-2.70806	0.0626836	1
0	-2.68327	0.0641564	1
0	-3.41026	0.0320738	1
0	-2.98321	0.0483346	1
0	-0.372083	0.408797	1
0	-3.5548	0.0278777	1
0	-3.5996	0.0266888	1
0	-1.12795	0.245121	1
0	-2.52687	0.0742116	1
0	-2.36152	0.0864023	1
0	-0.279726	0.431291	1
0	-2.02499	0.116928	1
0	-1.62077	0.165532	1
1	0.904574	0.712533	1
0	-3.66866	0.0249523	1
0	-3.49376	0.0295803	1
0	-1.8405	0.137364	1
0	-2.82016	0.0564116	1
0	-2.82941	0.0559213	1
0	-1.66833	0.159067	1
0	-3.26505	0.0369013	1
0	-2.15993	0.103698	1
0	-2.96205	0.0493174	1
0	-0.672044	0.338743	1
1	-3.1317	0.0419447	1
0	-2.46411	0.07864	1
0	-1.97	0.122727	1
0	-3.35367	0.033878	1
1	-1.56086	0.173975	1
0	-0.969845	0.275538	1
0	-2.92044	0.0513048	1
0	-2.56862	0.0713936	1
0	-2.23576	0.0968596	1
0	-1.69479	0.155559	1
0	-0.482226	0.382469	1
0	-3.553	0.0279265	1
0	-1.55937	0.174188	1
0	-1.93647	0.126382	1
0	-2.99734	0.0476888	1
0	-3.2422	0.0377219	1
0	-0.935147	0.282518	1
0	-2.98631	0.0481922	1
0	-1.96141	0.123655	1
0	-2.21084	0.0990611	1
0	-3.41074	0.0320587	1
0	-0.795083	0.311752	1
0	-2.9242	0.0511225	1
0	-2.90426	0.0520984	1
0	-2.19567	0.100424	1
0	-2.96786	0.0490454	1
0	-3.14758	0.0413111	1
0	-1.5559	0.174689	1
0	-2.78404	0.0583651	1
0	-2.71935	0.062024	1
0	-3.35403	0.0338661	1
0	-2.97916	0.0485211	1
1	-0.832056	0.303875	1
0	-3.27328	0.03661	1
0	-1.99246	0.12033	1
1	-3.14927	0.041244	1
0	-2.90119	0.0522501	1
1	0.541754	0.632951	1
0	-2.5948	0.0696774	1
0	-2.84636	0.055033	1
0	-2.34453	0.0877528	1
0	-3.13241	0.041916	1
0	-2.31611	0.0900544	1
0	-3.64004	0.0256583	1
0	-2.64494	0.0664965	1
0	-1.85556	0.135589	1
0	-2.98302	0.0483434	1
0	-2.07536	0.111827	1
0	-1.32019	0.21131	1
0	-3.02186	0.0465873	1
0	-2.54038	0.0732885	1
0	-3.36849	0.0333961	1
0	-3.2884	0.0360805	1
1	-0.610387	0.352688	1
0	-3.69855	0.0242354	1
0	-2.19741	0.100267	1
0	-1.62874	0.164434	1
0	-3.07793	0.0441593	1
0	-3.2177	0.0386214	1
0	-1.92918	0.12719	1
0	-2.71096	0.0625135	1
0	-2.32946	0.0889665	1
0	-3.1694	0.0404555	1
0	-2.62373	0.067825	1
0	-3.75509	0.0229336	1
0	-3.48573	0.0298117	1
0	-1.90376	0.130039	1
0	-2.3099	0.0905651	1
1	-2.01173	0.118304	1
0	-1.79895	0.142362	1
0	-1.26545	0.220576	1
1	-2.88019	0.0533001	1
0	0.64878	0.657444	1
0	-3.95393	0.0188764	1
0	-3.86451	0.0206056	1
0	-2.08809	0.110569	1
0	-2.60297	0.0691497	1
0	-2.89398	0.0526082	1
0	-2.086	0.110775	1
0	-3.17746	0.0401438	1
0	-1.74429	0.149167	1
0	-2.77688	0.0587598	1
1	-0.0241202	0.494756	1
0	-3.67743	0.0247398	1
0	-3.42311	0.0316771	1
0	-2.15639	0.104028	1
0	-3.26567	0.0368794	1
0	-3.20684	0.0390268	1
0	-1.10468	0.249452	1
0	-3.2211	0.0384955	1
0	-2.47256	0.0780299	1
0	-0.182638	0.455246	1
0	-0.776803	0.315688	1
0	-3.72006	0.0237318	1
0	-2.05503	0.113862	1
0	-2.98197	0.0483916	1
1	-1.62793	0.164545	1
1	-1.9923	0.120346	1
0	-2.62239	0.0679101	1
0	-2.92268	0.0511963	1
0	-2.78098	0.0585334	1
1	0.656685	0.659222	1
1	-2.41871	0.0819934	1
0	-2.7812	0.0585214	1
0	-1.94643	0.125287	1
0	-2.18508	0.101384	1
1	-2.66496	0.0652643	1
0	-1.97097	0.122622	1
0	-2.94979	0.049895	1
0	-2.22616	0.0977027	1
0	-3.01052	0.0470935	1
1	-0.630617	0.348084	1
0	-3.77106	0.0225785	1
0	-3.39045	0.0326946	1
0	-2.06314	0.113046	1
0	-2.67562	0.0646173	1
0	-2.86884	0.0538757	1
0	-2.00818	0.118675	1
1	-2.91681	0.0514823	1
0	-1.37879	0.201709	1
1	-0.988999	0.271731	1
0	-3.43796	0.0312247	1
0	-3.45918	0.0305894	1
0	-2.28037	0.0930264	1
0	-2.84754	0.0549718	1
0	-2.87316	0.053656	1
0	0.17408	0.54419	1
0	-2.5495	0.0726712	1
0	-2.60646	0.0689255	1
0	-2.14581	0.105018	1
1	-0.373209	0.408525	1
0	-2.97449	0.0487371	1
0	-2.3079	0.0907297	1
0	-1.94836	0.125076	1
0	-2.81764	0.0565457	1
0	-2.80724	0.0571033	1
0	-1.95598	0.124244	1
0	-3.16335	0.0406912	1
0	-3.11072	0.0427957	1
0	-2.17446	0.102356	1
0	0.557474	0.636595	1
0	-3.56254	0.0276686	1
0	-2.56371	0.0717199	1
0	-1.94697	0.125228	1
1	-2.61863	0.0681482	1
0	-2.96021	0.0494035	1
0	-1.88844	0.131782	1
0	-3.04758	0.0454581	1
0	-3.07246	0.0443907	1
0	-2.99406	0.0478379	1
1	-0.2212	0.445701	1
0	-3.6473	0.0254774	1
0	-2.69378	0.0635282	1
0	-1.06801	0.256381	1
0	-3.30295	0.0355779	1
0	-3.08937	0.0436791	1
0	-2.0196	0.117485	1
0	-3.00908	0.0471582	1
0	-2.59005	0.069986	1
0	-1.89936	0.130537	1
0	-1.103	0.249766	1
0	-2.19645	0.100353	1
0	-2.48039	0.0774685	1
0	-2.09753	0.109644	1
0	-3.09468	0.0434577	1
0	-3.08858	0.0437119	1
0	-1.41471	0.195988	1
0	-2.87846	0.0533871	1
0	-3.05416	0.0451735	1
0	-3.2337	0.0380319	1
0	-3.64217	0.0256049	1
0	-2.40791	0.08281	1
0	-1.52052	0.179848	1
0	-3.36138	0.0336264	1
1	-3.22594	0.0383169	1
0	-2.1207	0.107402	1
0	-3.02662	0.0463763	1
0	-2.46774	0.0783779	1
0	-3.45286	0.0307772	1
0	-3.49199	0.0296313	1
0	-3.15818	0.0408933	1
0	-1.09961	0.250403	1
0	-3.06867	0.0445516	1
1	-3.04918	0.0453887	1
0	-2.00818	0.118675	1
0	-3.32708	0.0347591	1
0	-2.58967	0.0700108	1
0	-2.40598	0.0829567	1
1	-0.151272	0.463035	1
0	-3.74992	0.0230499	1
0	-3.22306	0.038423	1
0	-0.19762	0.451533	1
0	-3.36843	0.033398	1
0	-2.56583	0.0715785	1
0	-1.0479	0.260233	1
0	-3.00623	0.0472865	1
0	-2.75461	0.0600036	1
1	-2.07266	0.112095	1
0	-0.809674	0.30863	1
0	-3.34708	0.0340943	1
0	-3.57732	0.0272738	1
0	-2.15299	0.104346	1
0	-2.62116	0.0679877	1
0	-2.81938	0.0564531	1
0	-0.884354	0.292927	1
0	-3.20079	0.0392543	1
0	-2.77188	0.0590369	1
0	-2.07704	0.11166	1
0	-3.42333	0.0316706	1
0	-2.88449	0.0530831	1
0	-2.4178	0.0820618	1
0	-3.07548	0.0442629	1
0	-2.85788	0.054437	1
0	-1.12215	0.246195	1
0	-1.78246	0.144387	1
1	0.673583	0.663007	1
0	-3.77613	0.022467	1
0	-3.51787	0.028896	1
1	-1.70631	0.154052	1
0	-2.15358	0.10429	1
1	-3.25289	0.037336	1
0	-1.54264	0.176609	1
0	-2.42835	0.0812706	1
1	-3.2426	0.0377077	1
1	0.195246	0.549435	1
0	-3.46111	0.0305322	1
0	-3.3205	0.0349806	1
0	-1.58107	0.17109	1
0	-2.44183	0.0802695	1
0	-2.86437	0.0541038	1
0	-1.48533	0.185097	1
0	-2.99814	0.0476524	1
0	-2.66767	0.0650994	1
1	-0.388427	0.404853	1
0	-3.46725	0.0303511	1
0	-2.36847	0.0858555	1
1	-0.617457	0.351076	1
0	-2.12817	0.106688	1
0	-2.21874	0.0983586	1
0	-0.984994	0.272525	1
0	-2.99116	0.0479703	1
0	-3.06209	0.0448329	1
1	-2.29217	0.0920358	1
1	-0.944363	0.280654	1
0	-2.86983	0.0538251	1
0	-3.36369	0.0335516	1
0	-2.29399	0.0918837	1
0	-2.82284	0.0562692	1
0	-2.89941	0.0523385	1
1	-0.0482371	0.488728	1
0	-2.34403	0.0877929	1
0	-2.65615	0.0658037	1
1	-0.247123	0.439306	1
0	-3.5536	0.0279101	1
0	-3.33913	0.034357	1
1	-0.830775	0.304146	1
0	-2.64543	0.0664659	1
0	-2.65547	0.0658458	1
0	-1.56352	0.173592	1
0	-2.51876	0.0747705	1
0	-2.47879	0.0775829	1
0	-1.85842	0.135254	1
1	-0.371018	0.409054	1
0	-3.93371	0.0192545	1
0	-3.26219	0.0370031	1
1	-0.936623	0.282219	1
0	-3.18935	0.0396879	1
0	-2.63345	0.0672131	1
1	-1.58819	0.170081	1
0	-2.49967	0.0761018	1
1	-3.33415	0.0345225	1
1	-2.50296	0.0758712	1
0	0.286466	0.5719	1
0	-3.87234	0.0204483	1
0	-2.07865	0.111501	1
0	-0.813955	0.307717	1
1	-3.01836	0.0467432	1
0	-2.63356	0.0672065	1
0	-2.06937	0.112422	1
0	-3.26679	0.0368395	1
0	-2.87234	0.0536977	1
0	-2.13236	0.106289	1
0	-2.36276	0.0863047	1
0	-3.20965	0.0389217	1
0	-3.54641	0.028106	1
0	-1.46732	0.187829	1
0	-3.12671	0.0421455	1
0	-3.28908	0.0360566	1
0	-1.25036	0.223183	1
0	-3.15963	0.0408364	1
0	-2.98742	0.0481414	1
0	0.232493	0.558638	1
0	-2.77365	0.0589387	1
0	-2.82296	0.0562627	1
1	-0.386402	0.405341	1
0	-3.07056	0.0444714	1
0	-2.50265	0.0758925	1
0	-1.61166	0.166795	1
0	-2.92649	0.0510113	1
1	-1.79662	0.142647	1
1	0.0166901	0.504958	1
0	-3.30356	0.0355567	1
0	-2.7872	0.0581916	1
0	-0.9804	0.273436	1
0	-2.31099	0.0904751	1
0	-2.89478	0.0525687	1
0	-2.00073	0.119456	1
0	-3.34314	0.0342243	1
0	-3.10268	0.0431263	1
1	-1.57726	0.171631	1
0	-3.28671	0.0361394	1
0	-3.38428	0.0328902	1
0	-1.66015	0.160164	1
0	-2.50068	0.0760307	1
0	-3.25657	0.0372041	1
0	-0.76303	0.318671	1
0	-3.30633	0.035462	1
0	-1.76585	0.146451	1
1	-0.283025	0.430483	1
0	-3.68359	0.0245916	1
0	-3.35414	0.0338626	1
0	-1.80945	0.141086	1
0	-2.89018	0.0527979	1
0	-2.79287	0.0578819	1
0	-1.41091	0.196586	1
0	-3.24239	0.0377151	1
0	-2.15422	0.104231	1
1	0.292455	0.573366	1
0	-3.43709	0.0312513	1
0	-2.96535	0.0491629	1
0	-0.949572	0.279603	1
0	-2.86057	0.0542986	1
0	-2.48099	0.0774261	1
0	-0.804089	0.309823	1
0	-2.97503	0.0487121	1
0	-1.67267	0.158487	1
0	-3.65523	0.0252812	1
0	-1.39338	0.199369	1
0	-0.0884769	0.478679	1
0	-2.82248	0.056288	1
0	-3.34983	0.0340037	1
1	0.513335	0.626324	1
0	-2.96829	0.0490255	1
1	-2.43436	0.0808228	1
0	-2.20278	0.0997826	1
0	-3.8898	0.0201014	1
0	-1.1605	0.239148	1
0	-2.82653	0.0560734	1
0	-3.37101	0.0333148	1
0	-1.77801	0.144938	1
0	-2.89117	0.0527484	1
1	-2.69026	0.0637377	1
0	-1.78845	0.14365	1
0	-3.62369	0.0260703	1
0	-3.54332	0.0281904	1
0	-1.46328	0.188447	1
0	-2.8685	0.0538927	1
0	-2.56862	0.0713937	1
0	-1.36271	0.204311	1
0	-2.49333	0.0765487	1
1	-3.44157	0.0311159	1
1	-2.46875	0.0783049	1
0	-3.34066	0.0343062	1
0	-3.74852	0.0230814	1
0	-1.54914	0.175665	1
0	-2.69502	0.0634546	1
0	-2.12758	0.106744	1
0	-3.20505	0.0390941	1
0	-2.87634	0.0534947	1
0	-1.7098	0.153597	1
0	-3.32283	0.034902	1
0	-3.99967	0.0180477	1
0	-1.74164	0.149504	1
0	-2.64331	0.0665975	1
0	-3.0458	0.0455356	1
0	-1.15507	0.240137	1
0	-2.80153	0.0574113	1
0	-3.63318	0.0258303	1
1	-2.70741	0.0627218	1
1	-1.45372	0.189913	1
0	-2.33363	0.0886294	1
0	-3.19376	0.0395204	1
1	-0.808413	0.308899	1
1	-1.7694	0.146008	1
0	-2.33602	0.0884363	1
0	-3.50504	0.0292582	1
0	-3.02068	0.0466399	1
0	-2.48039	0.0774686	1
0	-2.66059	0.0655312	1
0	-3.12553	0.0421931	1
0	-1.7447	0.149115	1
1	-0.854922	0.29906	1
0	-0.780396	0.314912	1
0	-3.57545	0.0273233	1
1	-3.78666	0.0222368	1
1	-1.45279	0.190056	1
0	-2.9589	0.049465	1
0	-2.69905	0.0632153	1
0	-1.84941	0.136312	1
0	-2.39174	0.0840464	1
0	-2.60823	0.0688117	1
0	-0.777508	0.315536	1
0	-3.13289	0.0418966	1
0	-3.51786	0.0288963	1
0	-2.02758	0.116661	1
0	-3.19433	0.0394987	1
0	-3.07483	0.0442905	1
0	-1.9138	0.128907	1
0	-2.79795	0.0576053	1
0	-2.12899	0.10661	1
0	-0.216182	0.446941	1
0	-3.38254	0.0329455	1
0	-3.51448	0.0289915	1
1	-0.90348	0.288981	1
0	-2.61272	0.0685249	1
0	-3.24638	0.0375707	1
0	0.572358	0.640031	1
1	-1.96693	0.123058	1
0	-0.729867	0.325914	1
0	-3.77668	0.0224549	1
0	-3.29352	0.0359027	1
0	-2.55085	0.0725809	1
0	-2.38695	0.0844157	1
0	-3.03076	0.0461938	1
0	-2.09474	0.109916	1
0	-2.74417	0.0605951	1
1	0.531692	0.63061	1
0	-2.48639	0.0770407	1
0	-3.33206	0.0345925	1
0	-2.0097	0.118516	1
0	-3.18576	0.0398251	1
0	-2.93674	0.0505174	1
0	-1.71815	0.152515	1
0	-2.01471	0.117994	1
0	-2.48817	0.0769146	1
0	-1.87235	0.133633	1
0	-3.15054	0.0411941	1
1	-3.60379	0.0265804	1
0	-2.36665	0.085998	1
0	-1.67582	0.158067	1
1	-3.27044	0.0367102	1
0	-1.42266	0.194738	1
0	-3.03761	0.0458929	1
0	-0.530364	0.371165	1
0	-1.31839	0.211609	1
0	-3.44911	0.0308894	1
0	-3.79803	0.021991	1
0	-1.91863	0.128366	1
0	-3.07249	0.0443894	1
0	-2.71106	0.0625075	1
0	-2.18235	0.101633	1
0	-2.84979	0.054855	1
1	-3.4013	0.0323533	1
0	0.368815	0.591932	1
0	-3.90077	0.0198866	1
0	-2.39478	0.0838126	1
0	-1.67052	0.158774	1
0	-2.58257	0.0704743	1
0	-1.94129	0.125851	1
0	-1.72189	0.152032	1
0	-3.62007	0.0261621	1
1	-1.03673	0.26239	1
0	-3.79108	0.0221409	1
0	-3.14046	0.0415938	1
0	-2.59489	0.0696713	1
0	-2.75348	0.0600677	1
0	-2.89793	0.0524121	1
0	-2.19379	0.100593	1
0	-2.49992	0.0760843	1
0	-2.79995	0.057497	1
1	-3.60813	0.0264682	1
0	-1.95779	0.124047	1
0	-3.16576	0.0405969	1
0	-3.33565	0.0344727	1
1	0.801214	0.690906	1
0	0.156068	0.539719	1
0	-3.41374	0.0319659	1
0	-3.62152	0.0261254	1
0	-1.94505	0.125439	1
0	-1.67053	0.158773	1
0	-3.11871	0.0424695	1
0	-2.60379	0.0690967	1
0	-2.26972	0.0939293	1
0	-2.6842	0.0641002	1
0	-1.78053	0.144626	1
0	-2.31501	0.0901448	1
0	-3.37396	0.0332201	1
0	-1.90153	0.130291	1
1	-2.6939	0.0635211	1
0	-2.55006	0.0726337	1
0	-0.757994	0.319765	1
0	-3.0245	0.0464701	1
0	-1.59672	0.168881	1
0	-3.57542	0.0273243	1
1	-2.48517	0.0771276	1
1	-1.72251	0.151953	1
0	-2.70314	0.0629737	1
0	-3.36478	0.0335162	1
0	-1.39103	0.199746	1
0	-1.73747	0.150035	1
1	-2.45244	0.0794897	1
0	-2.16738	0.103008	1
0	-1.77938	0.144768	1
0	-2.18723	0.101189	1
0	-3.20128	0.0392358	1
0	-1.5545	0.174891	1
0	-2.25847	0.0948909	1
0	-3.08136	0.0440147	1
1	-2.71803	0.0621008	1
0	-1.66405	0.15964	1
0	-2.75379	0.0600504	1
0	-2.92914	0.0508833	1
0	-2.13564	0.105979	1
0	-1.83557	0.13795	1
0	-0.928029	0.283963	1
0	-2.79116	0.0579753	1
0	-3.74829	0.0230866	1
1	-1.73372	0.150514	1
0	-2.85879	0.05439	1
0	-3.26762	0.0368101	1
0	-2.30929	0.0906148	1
0	-2.8972	0.0524482	1
0	-3.34398	0.0341966	1
0	-2.75802	0.059812	1
0	-0.860286	0.297937	1
0	-2.83991	0.0553692	1
0	-3.00263	0.047449	1
0	-2.09489	0.109902	1
0	-1.54775	0.175866	1
0	-0.640215	0.345909	1
0	-3.30933	0.0353596	1
0	-3.32422	0.034855	1
0	-2.27325	0.093629	1
0	-1.80631	0.141465	1
0	-1.41441	0.196034	1
0	-2.05199	0.114168	1
0	-1.70915	0.153682	1
0	-3.65145	0.0253745	1
0	-3.56181	0.0276884	1
0	-1.36863	0.20335	1
0	-2.57826	0.0707572	1
0	-1.10476	0.249437	1
0	-2.19244	0.100716	1
0	-3.83577	0.0211938	1
0	-3.49744	0.029475	1
0	-1.62623	0.164779	1
0	-2.79352	0.0578465	1
0	-2.24756	0.0958317	1
0	-1.8082	0.141237	1
0	-1.8359	0.137911	1
0	-2.71253	0.0624214	1
0	-2.25517	0.0951749	1
0	-2.61733	0.0682313	1
0	-1.46084	0.18882	1
0	-2.61617	0.068305	1
0	-3.087	0.043778	1
0	-2.11855	0.107608	1
0	-0.182124	0.455374	1
0	-1.07556	0.254944	1
0	-3.92538	0.0194124	1
0	-2.22433	0.0978641	1
0	-1.48284	0.185474	1
0	-3.06545	0.0446889	1
0	0.382267	0.595177	1
0	-2.55965	0.0719904	1
0	-1.3508	0.206254	1
0	-2.7031	0.0629757	1
1	-0.333584	0.418133	1
0	-3.12588	0.0421791	1
1	-2.95512	0.0496431	1
0	0.328209	0.582088	1
0	-2.38924	0.0842393	1
0	-2.74992	0.0602687	1
0	-1.70667	0.154005	1
1	-1.31634	0.211953	1
0	-1.96475	0.123294	1
0	-3.19162	0.0396016	1
0	-0.0989819	0.476058	1
0	-1.9555	0.124297	1
0	-3.50021	0.0293957	1
1	-2.00667	0.118833	1
0	-1.55254	0.175173	1
0	-3.0476	0.0454573	1
0	-2.87399	0.0536134	1
0	-1.63962	0.162945	1
0	-1.46679	0.18791	1
0	-3.67536	0.02479	1
0	-3.41914	0.0317991	1
0	-1.24341	0.224389	1
0	-2.8012	0.0574294	1
0	-3.18801	0.0397392	1
0	-0.985364	0.272451	1
0	-2.20063	0.0999763	1
0	-3.65362	0.0253209	1
0	-2.30331	0.0911092	1
1	-1.67869	0.157686	1
0	-2.87166	0.0537321	1
0	-3.33963	0.0343403	1
0	-1.53237	0.178106	1
0	-1.84698	0.136598	1
0	-3.92211	0.0194748	1
0	-2.31551	0.0901038	1
0	-1.65533	0.160813	1
0	-1.3195	0.211425	1
0	-3.03255	0.0461149	1
0	-1.88062	0.132679	1
0	-2.28573	0.092575	1
0	-2.75796	0.0598149	1
0	-2.00647	0.118854	1
1	-2.18945	0.100987	1
0	-3.1161	0.0425759	1
0	-2.96896	0.0489942	1
0	-2.18953	0.10098	1
0	-2.28022	0.0930397	1
0	-3.51725	0.0289135	1
0	-2.04034	0.115353	1
0	-2.24914	0.0956956	1
0	-3.29092	0.0359929	1
0	-3.01668	0.0468181	1
0	-2.00471	0.119039	1
0	-2.57391	0.0710437	1
0	-3.37356	0.0332329	1
0	-3.30134	0.0356331	1
0	-1.12361	0.245925	1
0	-2.93886	0.0504158	1
0	-3.21467	0.0387341	1
0	-0.0487688	0.488596	1
0	-2.93395	0.0506514	1
1	-1.93751	0.126268	1
0	-3.13634	0.0417583	1
0	-3.25057	0.0374195	1
0	-1.78225	0.144414	1
0	-1.93627	0.126405	1
0	-3.03863	0.0458482	1
0	-1.36885	0.203315	1
0	-2.97819	0.0485662	1
1	-2.72194	0.0618732	1
0	-1.62508	0.164937	1
0	-1.89819	0.13067	1
0	-3.03401	0.0460509	1
0	-1.66582	0.159402	1
0	-2.48463	0.077166	1
0	-3.01668	0.0468181	1
0	-0.683464	0.33619	1
0	-1.66111	0.160034	1
0	-1.88933	0.131679	1
0	-1.83392	0.138146	1
0	-3.03621	0.0459543	1
0	-0.120155	0.47078	1
0	-2.71075	0.0625262	1
0	-2.28469	0.0926624	1
0	-1.14577	0.241838	1
0	-2.5561	0.072228	1
0	-2.86216	0.0542172	1
0	-2.13102	0.106417	1
0	-2.99805	0.0476565	1
1	-2.07466	0.111896	1
1	-1.31047	0.212934	1
0	-3.28102	0.036338	1
0	-2.97176	0.0488639	1
0	0.623807	0.651798	1
0	-1.03602	0.262526	1
1	-2.0791	0.111455	1
0	-1.24361	0.224355	1
0	-3.12964	0.0420274	1
0	-2.82195	0.0563162	1
0	-1.7226	0.151941	1
0	-2.85113	0.0547853	1
0	-3.00608	0.0472936	1
0	-1.57789	0.171541	1
0	-2.41382	0.0823619	1
1	-3.09285	0.0435339	1
0	-1.84555	0.136767	1
0	-1.12564	0.245549	1
0	-3.40366	0.0322794	1
0	-1.78184	0.144464	1
0	-2.76623	0.059352	1
0	-3.25107	0.0374014	1
0	-1.98389	0.121239	1
0	-2.79302	0.0578736	1
0	-1.54248	0.176631	1
0	-2.94989	0.0498904	1
0	-2.81321	0.0567825	1
0	-2.08608	0.110766	1
0	-1.69998	0.154879	1
0	-2.62328	0.0678538	1
0	-0.374141	0.4083	1
0	-2.25106	0.0955296	1
0	-2.67155	0.0648633	1
1	-1.54442	0.17635	1
0	-2.87857	0.0533815	1
0	-3.19261	0.0395639	1
0	-1.58848	0.170042	1
0	-2.2241	0.0978846	1
0	-2.89037	0.0527884	1
0	-1.15351	0.240422	1
0	-2.04818	0.114555	1
0	-3.46076	0.0305426	1
0	-1.21013	0.230234	1
0	-2.92203	0.0512277	1
0	-2.45888	0.0790202	1
0	-2.00901	0.118588	1
0	-2.71371	0.0623529	1
0	-1.69449	0.155599	1
1	-0.842636	0.301642	1
0	-2.87974	0.0533225	1
0	-2.50199	0.0759393	1
0	-1.99657	0.119895	1
0	-3.13575	0.0417821	1
1	-2.56313	0.0717581	1
0	-2.2005	0.0999879	1
0	-2.55071	0.0725898	1
1	-0.699012	0.332729	1
0	-2.23983	0.0965044	1
0	-2.70233	0.0630211	1
1	-3.44635	0.0309721	1
0	-2.09504	0.109887	1
0	-2.71902	0.0620429	1
0	-2.99579	0.0477591	1
0	-1.99224	0.120352	1
0	-2.81272	0.0568088	1
0	-2.64291	0.0666223	1
0	-1.85151	0.136065	1
0	-3.28027	0.0363644	1
0	-3.15364	0.0410718	1
0	1.1016	0.751147	1
0	-3.08215	0.0439815	1
0	-3.85594	0.0207794	1
0	-1.37436	0.202423	1
0	-3.24032	0.0377905	1
0	-3.15145	0.0411581	1
0	-1.03518	0.262689	1
0	-2.92286	0.0511873	1
0	-3.64192	0.0256113	1
0	-1.45885	0.189125	1
0	-3.33936	0.0343492	1
0	-2.35675	0.0867798	1
0	-2.56952	0.0713342	1
0	-2.73901	0.0608896	1
1	-2.53927	0.0733642	1
0	-1.14949	0.241157	1
0	-2.81889	0.0564791	1
0	-3.19322	0.0395409	1
0	-2.0873	0.110646	1
0	-2.17786	0.102044	1
0	-1.60448	0.167794	1
0	-3.28292	0.0362717	1
0	-2.68955	0.0637805	1
1	-0.7941	0.311963	1
0	-3.08211	0.043983	1
1	-2.49186	0.0766529	1
0	-1.18656	0.234438	1
0	-2.35203	0.0871544	1
0	-2.79061	0.058005	1
1	-2.10711	0.108712	1
0	-3.22292	0.0384284	1
0	-2.38004	0.0849517	1
0	-1.83403	0.138132	1
0	-2.5015	0.0759736	1
0	-2.53799	0.0734512	1
0	-1.6977	0.155178	1
0	-1.91464	0.128812	1
0	-1.49563	0.183549	1
0	-2.75671	0.0598857	1
0	-2.6333	0.0672228	1
0	-2.24885	0.0957206	1
0	-2.47318	0.0779857	1
0	-2.09412	0.109977	1
0	-2.97507	0.0487103	1
0	-2.95533	0.0496335	1
1	0.419915	0.604215	1
0	-2.91685	0.05148	1
0	-2.73238	0.0612697	1
0	-1.19769	0.232446	1
0	-2.31468	0.0901717	1
0	-3.0482	0.0454313	1
0	0.66049	0.660076	1
0	-2.97269	0.0488207	1
0	-2.38554	0.0845248	1
0	-2.80376	0.0572907	1
0	-2.84773	0.0549616	1
0	-1.88878	0.131743	1
0	-2.63525	0.0671002	1
0	-1.67119	0.158685	1
0	-2.33865	0.0882249	1
0	-3.13377	0.0418615	1
0	-0.518354	0.373973	1
0	-3.17606	0.0401977	1
0	-2.93494	0.0506038	1
0	-1.42822	0.193867	1
0	-2.90116	0.0522519	1
0	-3.26183	0.0370159	1
0	-2.03757	0.115635	1
0	-2.84317	0.0551993	1
0	-1.28717	0.216866	1
0	-3.0984	0.0433035	1
0	-3.39443	0.032569	1
0	-1.74386	0.149222	1
0	-3.03814	0.0458698	1
0	-2.78925	0.0580796	1
0	-1.71033	0.15353	1
1	-2.12682	0.106816	1
0	-2.87835	0.0533926	1
1	-2.1672	0.103025	1
0	-2.41918	0.0819578	1
0	-2.18819	0.101101	1
0	-2.39497	0.0837984	1
0	-3.17909	0.040081	1
0	-2.30983	0.0905709	1
0	-3.33668	0.0344386	1
0	-3.16949	0.0404521	1
0	-1.65936	0.16027	1
0	-2.00943	0.118544	1
0	-2.67402	0.0647136	1
0	-2.00119	0.119408	1
0	-4.17699	0.0151596	1
0	-1.15226	0.240651	1
0	-3.71327	0.0238897	1
0	-2.9998	0.047577	1
1	1.3767	0.798966	1
0	-3.16683	0.0405552	1
0	-2.99363	0.0478576	1
0	-2.17386	0.102411	1
0	-2.39421	0.0838564	1
0	-3.21106	0.0388689	1
0	0.25845	0.565028	1
0	-3.21136	0.0388575	1
0	-1.74649	0.148888	1
0	-2.57074	0.0712534	1
0	-2.99243	0.0479121	1
0	-1.84107	0.137296	1
0	-3.42331	0.0316711	1
1	-1.15309	0.240499	1
1	-2.69542	0.0634305	1
0	-3.29048	0.036008	1
1	0.418657	0.603914	1
0	-3.27543	0.0365343	1
0	-2.83867	0.0554341	1
1	-1.53822	0.177252	1
0	-3.09397	0.0434874	1
0	-3.23603	0.0379466	1
1	0.51646	0.627055	1
0	-3.03071	0.046196	1
0	-2.5477	0.0727931	1
0	-0.751946	0.321082	1
0	-2.98035	0.0484663	1
0	-3.15006	0.041213	1
0	-1.79465	0.142888	1
0	-3.13932	0.0416395	1
0	-1.02301	0.265053	1
0	-3.18696	0.0397795	1
0	-2.8626	0.0541943	1
1	-2.12032	0.107438	1
0			1
0	-3.39012	0.0327049	1
1	-1.0264	0.264394	1
0	-2.61846	0.068159	1
0	-3.22414	0.0383832	1
0	-1.18686	0.234385	1
0	-2.82169	0.0563301	1
0	-3.63114	0.0258818	1
0	-1.99703	0.119846	1
0	-3.179	0.0400843	1
0	-2.85622	0.0545223	1
1	-1.90914	0.129432	1
0	-3.26682	0.0368384	1
0	-2.4505	0.0796322	1
1	-1.19599	0.23275	1
1	-2.98361	0.0483163	1
0	-3.03507	0.0460041	1
0	-1.9128	0.12902	1
0	-2.79561	0.0577326	1
0	-2.88195	0.0532111	1
0	-1.07252	0.255522	1
0	-3.02213	0.0465753	1
0	-2.82252	0.0562861	1
1	-1.31118	0.212815	1
0	-2.92338	0.0511622	1
0	-3.29732	0.0357715	1
0	-0.832345	0.303814	1
0	-3.25959	0.0370957	1
1	-3.08999	0.0436532	1
1	-0.69486	0.333651	1
0	-3.38672	0.0328128	1
0	-3.0357	0.0459764	1
0	-1.96764	0.122981	1
0	-3.20744	0.0390042	1
0	-3.06246	0.0448168	1
0	-1.11943	0.246701	1
0	-3.07031	0.0444822	1
0	-3.39319	0.0326079	1
0	-1.19535	0.232865	1
0	-2.55792	0.0721065	1
0	-3.29471	0.0358615	1
0	-2.05326	0.11404	1
0	-3.29324	0.0359125	1
0	-3.24267	0.037705	1
0	-1.4831	0.185434	1
0	-3.01815	0.0467523	1
0	-2.3714	0.0856257	1
1	0.282478	0.570924	1
0	-2.82769	0.0560119	1
0	-3.66386	0.0250694	1
0	-1.29395	0.215716	1
0	-2.61336	0.0684834	1
0	-2.59691	0.069541	1
1	-0.319252	0.421624	1
0	-2.97851	0.0485512	1
0	-2.35956	0.0865566	1
0	-1.07275	0.255478	1
0	-2.17994	0.101853	1
0	-3.18439	0.0398774	1
1	0.952573	0.722263	1
0	-3.29544	0.0358363	1
0	-2.66022	0.0655542	1
0	-2.20781	0.099332	1
0	-2.77825	0.0586844	1
0	-3.10363	0.0430872	1
1	0.183498	0.546525	1
0	-3.23498	0.037985	1
0	-2.55279	0.0724503	1
0	-1.23166	0.226441	1
1	-0.944057	0.280716	1
1	-3.22697	0.0382787	1
0	-1.85859	0.135235	1
0	-3.00251	0.0474543	1
0	-2.928	0.0509383	1
0	-2.00752	0.118744	1
0	-2.86254	0.0541973	1
0	-2.91884	0.0513832	1
0	-1.30774	0.213393	1
0	-3.20621	0.0390507	1
1	-2.27842	0.0931913	1
0	-1.73006	0.150982	1
0	-2.9648	0.0491885	1
0	-2.64783	0.0663173	1
1	-1.75321	0.148038	1
0	-3.29689	0.0357865	1
0	-3.29687	0.0357869	1
0	-2.06278	0.113082	1
0	-2.62664	0.0676412	1
0	-2.92827	0.0509254	1
0	-2.40476	0.0830496	1
0	-2.91117	0.051758	1
0	-3.37799	0.0330909	1
0	-2.22471	0.0978303	1
0	-1.8079	0.141272	1
0	-3.1408	0.0415803	1
1	-1.08067	0.253975	1
0	-3.04946	0.0453766	1
0	-2.46029	0.0789171	1
0	-1.79408	0.142958	1
0	-1.41523	0.195905	1
0	-2.86834	0.053901	1
0	-1.04869	0.260082	1
0	-3.10667	0.0429619	1
0	-2.32633	0.0892209	1
0	-1.91454	0.128824	1
0	-2.57829	0.0707549	1
0	-1.69003	0.156186	1
0	-1.71501	0.152921	1
0	-2.89113	0.0527506	1
0	-2.65091	0.0661267	1
1	-1.21646	0.229114	1
0	-2.71377	0.0623492	1
0	-3.13544	0.0417946	1
1	-0.347319	0.414795	1
0	-3.11057	0.0428017	1
0	-1.77706	0.145056	1
0	-3.08465	0.0438767	1
0	-3.36022	0.0336643	1
0	-1.90936	0.129406	1
0	-2.79158	0.0579522	1
0	-2.56439	0.0716743	1
0	-1.98807	0.120795	1
1	-2.30437	0.0910216	1
0	-2.45866	0.0790361	1
1	-2.16651	0.103088	1
0	-3.89682	0.0199636	1
0	-1.456	0.189562	1
0	-2.54257	0.0731402	1
0	-3.2153	0.0387109	1
0	-0.85008	0.300076	1
0	-2.17319	0.102473	1
0	-1.9299	0.127109	1
0	-1.77571	0.145224	1
1	-2.53907	0.0733774	1
0	-2.57888	0.0707165	1
0	-1.93236	0.126838	1
0	-2.83547	0.0556019	1
0	-2.18252	0.101618	1
0	-1.82083	0.139712	1
0	-1.23923	0.225118	1
0	-2.72399	0.0617544	1
1	-0.805787	0.30946	1
0	-3.42291	0.0316833	1
0	-2.90912	0.0518588	1
0	-1.27782	0.218457	1
0	-1.67253	0.158505	1
0	-2.8758	0.0535217	1
1	-1.97524	0.122164	1
0	-2.42602	0.0814448	1
0	-2.23257	0.0971393	1
0	-2.0266	0.116762	1
0	-2.63059	0.0673927	1
0	-2.96843	0.0490189	1
1	-1.5552	0.174789	1
0	-2.97602	0.0486665	1
0	-2.64762	0.0663301	1
0	-1.62289	0.16524	1
0	-2.11454	0.107994	1
1	-2.84248	0.0552353	1
0	-1.0172	0.266187	1
0	-3.22793	0.0382436	1
0	-2.98199	0.0483904	1
0	-1.60922	0.167134	1
0	-2.31327	0.0902875	1
0	-3.26686	0.0368371	1
0	-1.09676	0.250937	1
0	-2.91697	0.0514743	1
0	-3.86989	0.0204974	1
1	-0.894078	0.290917	1
0	-3.03515	0.0460007	1
0	-3.06415	0.0447444	1
1	-2.32647	0.0892091	1
0	-2.83103	0.0558355	1
0	-3.56876	0.0275018	1
1	-1.17946	0.235715	1
0	-2.94314	0.0502116	1
0	-3.18585	0.0398219	1
0	0.568232	0.63908	1
0	-3.85903	0.0207166	1
0	-1.68719	0.15656	1
0	-2.25508	0.0951826	1
0	-2.85139	0.0547721	1
0	-1.73081	0.150887	1
0	-3.28575	0.0361727	1
0	-2.71724	0.0621468	1
0	-0.989414	0.271649	1
0	-2.47205	0.0780668	1
0	-2.86753	0.0539422	1
0	-1.82665	0.139014	1
0	-3.11803	0.0424972	1
0	-2.98283	0.0483521	1
0	-1.652	0.161263	1
0	-2.66837	0.0650569	1
0	-3.21822	0.0386021	1
0	-1.61304	0.166602	1
0	-3.2179	0.038614	1
0	-2.65086	0.06613	1
0	-1.44283	0.191595	1
0	-3.23493	0.0379868	1
0	-1.38575	0.20059	1
0	-3.34229	0.0342523	1
0	-4.17305	0.0152185	1
1	-1.06544	0.256871	1
0	-3.28045	0.0363579	1
0	-3.25739	0.0371746	1
0	-0.733236	0.325174	1
0	-1.44057	0.191944	1
0	-3.45601	0.0306836	1
0	-1.96202	0.123589	1
0	-2.29742	0.0915981	1
0	-3.39801	0.0324561	1
0	-2.34286	0.0878864	1
0	-2.03667	0.115727	1
0	-2.54131	0.0732251	1
0	-2.19391	0.100583	1
0	-2.98796	0.0481164	1
0	-3.08994	0.043655	1
0	-1.38102	0.20135	1
0	-3.19604	0.0394339	1
0	-1.28001	0.218084	1
0	-2.5512	0.0725568	1
1	0.229829	0.557981	1
0	-1.9208	0.128124	1
0	-2.62849	0.0675251	1
0	-1.35682	0.20527	1
0	-2.54472	0.0729941	1
0	-3.28225	0.036295	1
0	-1.54452	0.176335	1
0	-2.65057	0.0661479	1
0	-1.84215	0.137169	1
0	-2.98087	0.0484422	1
0	-3.29431	0.0358754	1
0	-1.84131	0.137268	1
1	-2.23046	0.0973239	1
1	-1.84484	0.13685	1
0	-1.99163	0.120417	1
0	-3.27099	0.0366907	1
0	-1.42422	0.194493	1
0	-3.11277	0.0427118	1
1	0.319501	0.579968	1
0	-1.45313	0.190004	1
0	-3.3762	0.0331481	1
0	-1.73631	0.150183	1
0	-3.39712	0.0324841	1
0	-0.885522	0.292685	1
0	-3.21828	0.0386001	1
0	-3.34891	0.034034	1
0	-0.88932	0.291899	1
0	-3.78394	0.0222962	1
0	-2.43065	0.0810993	1
0	-2.92362	0.0511506	1
0	-3.42586	0.0315929	1
0	-1.73385	0.150497	1
0	-3.66074	0.0251459	1
0	-0.99007	0.27152	1
1	-1.20788	0.230633	1
0	-3.01739	0.0467865	1
1	-2.08567	0.110806	1
0	-2.74322	0.0606492	1
0	-1.89913	0.130563	1
0	-3.23693	0.0379139	1
0	-2.82814	0.0559882	1
0	-2.12719	0.106781	1
0	-3.91356	0.0196387	1
0	-1.48128	0.18571	1
0	-2.862	0.0542253	1
0	-3.04054	0.0457646	1
0	-1.62274	0.165261	1
0	-2.76942	0.0591739	1
0	-1.93206	0.12687	1
0	-2.52158	0.074576	1
0	-2.86095	0.0542791	1
0	-1.87993	0.132758	1
0	-3.06458	0.0447262	1
0	-0.946853	0.280151	1
0	-2.77155	0.0590553	1
1	-1.89636	0.130878	1
0	-3.06035	0.0449072	1
1	0.157036	0.539959	1
0	-3.2256	0.0383294	1
0	-1.05589	0.258698	1
0	-2.02084	0.117357	1
0	-1.73535	0.150306	1
0	-3.31928	0.0350217	1
1	-1.11625	0.247291	1
0	-2.80544	0.0571999	1
0	-1.7305	0.150926	1
1	-3.01504	0.0468911	1
1	0.0688041	0.517979	1
0	-3.0024	0.0474593	1
1	-1.58125	0.171064	1
0	-3.26217	0.037004	1
1	-1.46146	0.188724	1
0	-3.56713	0.0275453	1
0	-1.96397	0.123378	1
0	-2.92996	0.0508438	1
0	-1.04865	0.26009	1
0	-3.30861	0.0353841	1
0	-1.87898	0.132868	1
0	-2.93767	0.050473	1
0	-2.14357	0.105229	1
0	-2.65733	0.0657312	1
1	-1.21931	0.228612	1
0	-2.95512	0.0496429	1
1	0.262403	0.565999	1
1	-0.812153	0.308101	1
0	-2.51546	0.074999	1
1	-0.808732	0.308831	1
0	-3.47948	0.0299931	1
0	-0.991491	0.271238	1
0	-2.92818	0.0509297	1
0	-1.42552	0.194289	1
0	-3.54446	0.0281594	1
0	-1.57942	0.171324	1
0	-2.93318	0.0506886	1
0	-1.75904	0.147305	1
0	-3.07974	0.044083	1
0	-1.49814	0.183173	1
0	-2.90305	0.0521582	1
1	-2.03724	0.115669	1
0	-4.00533	0.0179477	1
0	-2.09984	0.109418	1
0	-3.03952	0.0458093	1
1	-1.7387	0.149878	1
0	-3.52976	0.0285643	1
0	-1.31608	0.211996	1
0	-3.34472	0.0341721	1
0	1.48066	0.815147	1
0	-3.74591	0.0231403	1
0	-2.08784	0.110593	1
0	-3.33263	0.0345734	1
0	-1.49577	0.183527	1
0	-3.92335	0.0194512	1
0	-2.08972	0.110408	1
0	-3.332	0.0345944	1
0	-2.13519	0.106021	1
0	-2.20191	0.0998609	1
0	-2.35967	0.0865487	1
0	-2.31322	0.0902918	1
0	-0.802373	0.31019	1
0	-1.80994	0.141025	1
0	-3.34542	0.0341489	1
0	-1.92941	0.127165	1
0	-1.898	0.130692	1
0	-3.13738	0.041717	1
0	-2.03372	0.11603	1
0	-3.93919	0.0191512	1
0	-1.154	0.240333	1
1	-3.32748	0.0347456	1
0	-1.77824	0.144909	1
0	-2.13684	0.105865	1
0	-1.55355	0.175027	1
0	-3.19489	0.0394775	1
0	-1.9911	0.120473	1
0	-3.06455	0.0447277	1
0	-1.93789	0.126226	1
0	-2.92864	0.0509076	1
0	-1.16917	0.237573	1
0	-2.66679	0.0651528	1
0	-1.60321	0.167972	1
0	-2.93573	0.050566	1
0	-1.96948	0.122783	1
0	-3.17777	0.0401316	1
1	-1.24343	0.224386	1
0	-2.69954	0.0631861	1
0	-1.64586	0.162096	1
0	-3.09551	0.0434233	1
1	-1.11255	0.247981	1
0	-3.12173	0.0423472	1
0	-1.06461	0.257029	1
0	-3.73326	0.0234281	1
0	-1.54816	0.175807	1
0	-2.74008	0.0608287	1
1	-1.81418	0.140513	1
0	-4.12733	0.0159192	1
0	-1.29095	0.216224	1
0	-2.84218	0.0552507	1
0	-1.9966	0.119892	1
1	-3.02754	0.0463355	1
0	-1.4922	0.184063	1
0	-3.25744	0.0371728	1
0	-1.28321	0.217539	1
0	-3.71425	0.0238668	1
1	-1.10572	0.249258	1
0	-3.40982	0.0320875	1
0	-0.745459	0.322498	1
0	-2.58696	0.0701871	1
0	-1.51362	0.180867	1
0	-3.14134	0.0415587	1
0	-1.90944	0.129397	1
0	-2.5719	0.0711764	1
0	-2.12134	0.10734	1
0	-3.06535	0.0446935	1
1	-0.618285	0.350887	1
0	-2.10985	0.108446	1
1	-1.68571	0.156756	1
0	-2.87841	0.0533899	1
1	-1.68121	0.157352	1
0	-2.47582	0.0777958	1
0	-1.04244	0.261285	1
0	-2.94104	0.0503118	1
1	0.502204	0.623715	1
0	-2.23458	0.0969624	1
1	-1.65142	0.161343	1
0	-3.1411	0.0415684	1
0	-1.54003	0.176988	1
0	-3.02505	0.0464459	1
0	-1.05675	0.258532	1
0	-3.2881	0.0360908	1
1	0.267533	0.567259	1
0	-3.12339	0.0422796	1
0	-1.3687	0.203338	1
0	-3.41572	0.0319047	1
1	-0.793896	0.312007	1
0	-3.05587	0.0450999	1
0	-1.84918	0.136339	1
1	-0.376426	0.407748	1
0	-1.86895	0.134028	1
0	-1.72571	0.151541	1
0	-1.24619	0.223905	1
0	-3.30748	0.0354227	1
0	-0.886653	0.292451	1
0	-2.41736	0.0820952	1
0	-1.70965	0.153618	1
0	-3.47519	0.0301182	1
0	-2.23358	0.0970505	1
0	-3.17342	0.0402995	1
1	-2.21596	0.0986054	1
0	-3.0757	0.0442537	1
0	-1.71755	0.152593	1
0	-2.95794	0.0495102	1
0	-1.61901	0.165775	1
0	-3.55205	0.0279523	1
0	-1.56785	0.172972	1
0	-3.03108	0.0461796	1
0	-0.392262	0.403929	1
0	-3.24237	0.0377159	1
0	-1.20992	0.230271	1
0	-2.28237	0.0928581	1
0	-0.671765	0.338805	1
0	-2.27389	0.0935747	1
1	-0.785186	0.31388	1
0	-3.18491	0.0398577	1
0	-0.763812	0.318501	1
0	-3.43312	0.0313715	1
1	-1.47143	0.187203	1
0	-3.11485	0.042627	1
0	-1.94538	0.125402	1
0	-4.09475	0.0164377	1
0	-2.23227	0.097165	1
0	-3.28644	0.0361488	1
0	-2.21681	0.09853	1
0	-3.39672	0.0324969	1
0	-0.797239	0.31129	1
0	-3.27877	0.0364167	1
0	-1.92327	0.127847	1
0	-3.34178	0.0342694	1
1	-0.691838	0.334323	1
0	-3.40155	0.0323454	1
0	-1.14396	0.24217	1
0	-3.29387	0.0358907	1
0	-1.34392	0.207382	1
0	-2.18647	0.101258	1
0	-1.77391	0.145448	1
0	-3.53721	0.0283583	1
0	-1.8907	0.131523	1
1	-2.7315	0.0613209	1
0	-1.20343	0.231424	1
0	-3.72769	0.0235558	1
0	-0.996549	0.27024	1
0	-3.07386	0.0443313	1
0	-0.0160611	0.49677	1
0	-2.8668	0.0539794	1
0	-1.87093	0.133798	1
0	-2.85021	0.0548331	1
1	1.53221	0.822787	1
0	-3.49302	0.0296017	1
0	-2.48059	0.0774546	1
0	-2.80994	0.056958	1
1	-0.980723	0.273372	1
0	-3.47565	0.0301048	1
0	-1.8097	0.141055	1
0	-0.721873	0.327673	1
0	-2.8581	0.0544256	1
0	-1.44142	0.191813	1
0	-3.35102	0.0339647	1
0	-1.57718	0.171642	1
0	-3.25451	0.0372779	1
1	-0.809446	0.308679	1
0	-3.37146	0.0333005	1
0	-2.14925	0.104696	1
0	-3.57201	0.027415	1
0	-1.69969	0.154917	1
0	-3.25454	0.0372765	1
1	-0.758145	0.319732	1
0	-2.29513	0.0917892	1
0	-1.93912	0.126091	1
0	-3.33188	0.0345984	1
0	-0.889033	0.291959	1
0	-3.51781	0.0288977	1
0	-1.73385	0.150497	1
0	-3.25415	0.0372908	1
1	-1.59048	0.16976	1
0	-2.74856	0.0603458	1
0	-0.881314	0.293557	1
1	-1.8855	0.132119	1
0	-1.97984	0.121672	1
0	-2.2558	0.0951207	1
1	-0.985281	0.272468	1
0	-2.85548	0.0545607	1
0	-2.01287	0.118186	1
0	-2.76771	0.0592692	1
1	-0.783979	0.31414	1
0	-2.91197	0.0517191	1
0	-1.65577	0.160754	1
0	-3.53719	0.0283589	1
0	-1.09755	0.250789	1
0	-3.01452	0.0469145	1
0	-2.05368	0.113999	1
0	-3.04865	0.0454119	1
0	-1.65017	0.161511	1
0	-2.93272	0.0507107	1
0	-1.73903	0.149836	1
0	-2.35133	0.0872097	1
0	-1.61069	0.16693	1
0	-2.85057	0.0548146	1
0	-1.73459	0.150402	1
0	-2.42973	0.0811673	1
0	-1.98606	0.121008	1
1	1.83813	0.863099	1
0	-3.15252	0.041116	1
0	-1.98432	0.121194	1
0	-2.96408	0.0492219	1
0	-2.16647	0.103092	1
0	-2.67976	0.0643671	1
0	-0.987188	0.27209	1
0	-3.07152	0.0444309	1
0	-2.09615	0.109779	1
0	-3.10923	0.042857	1
0	-1.51408	0.180799	1
0	-3.0773	0.044186	1
0	-0.954604	0.278591	1
0	-3.44615	0.030978	1
0	-2.37132	0.0856318	1
0	-3.30379	0.0355489	1
0	-0.923042	0.284978	1
0	-3.02271	0.0465499	1
0	-1.77408	0.145425	1
0	-3.28497	0.0361999	1
0	-2.04557	0.11482	1
0	-1.66325	0.159747	1
1	-1.42608	0.194201	1
0	-3.09895	0.0432805	1
0	-0.828015	0.304731	1
0	-3.24511	0.0376165	1
0	-1.63543	0.163517	1
0	-2.30877	0.0906576	1
0	-0.841607	0.301858	1
0	-3.01886	0.0467208	1
0	-1.46473	0.188225	1
0	-3.23975	0.0378111	1
1	0.378204	0.594198	1
1	-1.43059	0.193496	1
1	-1.35635	0.205347	1
0	-3.09746	0.0433423	1
0	-1.80881	0.141163	1
0	-3.18885	0.0397073	1
1	1.67162	0.84221	1
0	-2.78683	0.0582122	1
1	-1.46464	0.188239	1
0	-3.03261	0.0461122	1
0	-0.566333	0.36281	1
1	-0.853465	0.299365	1
0	-3.31437	0.0351881	1
0	-2.02525	0.116901	1
0	-3.56556	0.0275875	1
0	-1.6475	0.161872	1
0	-2.81059	0.0569233	1
0	-1.96485	0.123283	1
0	-2.12396	0.10709	1
0	-1.57745	0.171604	1
0	-2.90426	0.0520983	1
0	-0.717804	0.32857	1
0	-3.57581	0.0273138	1
1	-0.997104	0.27013	1
0	-3.27444	0.0365691	1
0	-2.01307	0.118165	1
0	-2.84925	0.0548828	1
1	-1.43327	0.193079	1
0	-2.79772	0.0576178	1
0	-1.60594	0.167591	1
0	-3.24592	0.0375872	1
0	-1.05635	0.25861	1
0	-2.1391	0.105651	1
0	-2.94276	0.0502297	1
0	-1.85328	0.135857	1
0	-3.21085	0.0388768	1
0	-1.21147	0.229997	1
0	-2.60034	0.0693188	1
0	-1.89282	0.131281	1
0	-3.0774	0.0441816	1
0	0.267728	0.567307	1
0	-3.17324	0.0403067	1
0	-1.4108	0.196604	1
0	-2.85961	0.0543479	1
0	-0.312076	0.423375	1
0	-3.37175	0.0332911	1
0	-2.36828	0.0858703	1
0	-2.86198	0.0542263	1
1	1.6809	0.843439	1
0	-2.66213	0.0654371	1
1	-1.78063	0.144613	1
0	-2.99531	0.0477811	1
0	-0.836795	0.302873	1
0	-4.0019	0.0180081	1
0	-1.07366	0.255304	1
0	-2.94941	0.0499131	1
0	-1.27352	0.219192	1
0	-3.28185	0.0363091	1
0	-0.974258	0.274658	1
0	-3.10136	0.0431809	1
0	-2.00892	0.118597	1
0	-3.29078	0.0359976	1
0	-1.47626	0.18647	1
0	-2.96523	0.0491686	1
0	-2.00073	0.119456	1
0	-1.35493	0.205579	1
0	-3.35566	0.0338129	1
1	0.472123	0.616629	1
0	-3.7063	0.0240529	1
0	-1.3576	0.205142	1
0	-2.74211	0.0607127	1
0	-1.27098	0.219627	1
0	-2.50514	0.0757185	1
0	-1.51775	0.180256	1
0	-1.92556	0.127592	1
0	-3.22795	0.0382429	1
0	-1.07944	0.254207	1
0	-3.15317	0.0410901	1
0	-2.03322	0.116082	1
0	-3.23908	0.0378357	1
1	-0.948227	0.279875	1
0	-3.00641	0.0472786	1
0	-2.20749	0.0993607	1
0	-1.49946	0.182976	1
0	-2.85134	0.0547744	1
0	-1.84725	0.136567	1
0	-3.55731	0.0278098	1
1	-1.48486	0.185169	1
0	-2.99487	0.0478008	1
0	-1.01956	0.265726	1
0	-3.11837	0.0424837	1
0	-1.65604	0.160718	1
0	-3.3639	0.0335447	1
0	-1.97342	0.122359	1
0	-3.48349	0.0298765	1
0	-1.09172	0.251886	1
0	-3.06093	0.0448823	1
0	-1.19722	0.23253	1
0	-3.49444	0.0295609	1
1	-1.34362	0.207432	1
0	-2.98734	0.0481449	1
0	-1.91308	0.128987	1
0	-2.26062	0.0947069	1
0	-0.915571	0.286503	1
0	-3.23049	0.0381496	1
0	-1.98822	0.120779	1
0	-3.19398	0.039512	1
1	-1.4736	0.186873	1
0	-2.931	0.0507936	1
0	-1.62334	0.165178	1
0	-1.44929	0.190595	1
0	-3.35702	0.0337683	1
0	-2.00882	0.118608	1
0	-2.20687	0.0994159	1
0	-1.96664	0.123089	1
0	-3.21064	0.0388844	1
0	-1.36866	0.203346	1
0	-2.95403	0.0496946	1
0	-0.573338	0.361192	1
0	-2.98493	0.0482557	1
0	-1.77772	0.144974	1
0	-2.56098	0.0719018	1
1	-0.780434	0.314904	1
1	-2.88963	0.0528258	1
0	-1.74331	0.149291	1
0	-2.27871	0.0931668	1
0	-1.14437	0.242095	1
0	-3.27465	0.0365617	1
0	-0.808529	0.308874	1
0	-3.79192	0.0221228	1
0	-0.775549	0.315959	1
0	-2.61329	0.0684882	1
0	-2.00073	0.119456	1
0	-3.57558	0.0273201	1
1	-1.54512	0.176249	1
0	-3.09051	0.0436314	1
0	1.4709	0.813671	1
0	-4.05137	0.0171539	1
0	-1.8511	0.136113	1
0	-2.95352	0.0497186	1
0	-1.8245	0.139271	1
0	-3.05854	0.0449853	1
0	-1.18849	0.234093	1
0	-3.00963	0.0471337	1
0	-2.1668	0.103062	1
0	-2.65682	0.0657628	1
1	-1.07917	0.254259	1
0	-2.39317	0.083936	1
0	-2.10262	0.109148	1
0	-3.58733	0.0270095	1
0	-1.68517	0.156828	1
0	-2.87882	0.053369	1
0	-1.50021	0.182863	1
0	-2.87067	0.0537824	1
0	-1.37679	0.202031	1
0	-2.8562	0.0545234	1
0	-1.44091	0.191891	1
0	-2.6897	0.063771	1
0	-1.64263	0.162535	1
0	-2.89764	0.0524261	1
1	-0.442937	0.39179	1
0	-3.34887	0.0340353	1
0	-1.31106	0.212835	1
0	-3.24297	0.0376943	1
1	0.970664	0.725877	1
0	-2.60434	0.0690616	1
0	-1.235	0.225857	1
0	-3.12632	0.0421612	1
1	1.12294	0.755115	1
0	-2.87047	0.0537925	1
0	-1.4529	0.190039	1
0	-2.71486	0.0622853	1
0	-1.57742	0.171608	1
0	-3.87628	0.0203696	1
0	-1.2453	0.224061	1
0	-2.1914	0.10081	1
0	-3.48993	0.0296904	1
0	-1.14807	0.241417	1
0	-3.05018	0.0453456	1
0	-1.71153	0.153373	1
0	-3.61122	0.0263888	1
0	-1.85388	0.135787	1
0	-3.19833	0.0393473	1
0	-1.5249	0.179202	1
0	-1.55299	0.175108	1
0	-3.29459	0.0358657	1
0	-2.0773	0.111634	1
0	-2.73511	0.061113	1
0	-0.604306	0.354078	1
0	-2.36635	0.0860219	1
0	-2.24864	0.0957388	1
1	-1.17997	0.235623	1
0	-3.58162	0.0271599	1
0	-1.87801	0.13298	1
0	-2.96071	0.0493803	1
0	-1.51569	0.180562	1
0	-3.14677	0.0413432	1
0	-1.03042	0.263612	1
0	-2.57472	0.07099	1
0	-1.76779	0.14621	1
0	-0.449393	0.390253	1
0	-1.87922	0.13284	1
0	-3.58393	0.0270989	1
0	-1.52269	0.179528	1
1	-3.34311	0.0342252	1
0	-1.07214	0.255593	1
0	-2.83548	0.0556015	1
1	-0.485318	0.381739	1
0	-3.40321	0.0322933	1
0	-2.13528	0.106013	1
0	-2.20514	0.0995716	1
0	-3.00904	0.0471603	1
1	-0.352254	0.413598	1
0	-2.41985	0.0819076	1
1	-1.28473	0.21728	1
0	-2.93205	0.0507431	1
0	-2.09234	0.110151	1
0	-4.11909	0.0160487	1
0	-1.17799	0.23598	1
1	-2.04158	0.115226	1
0	-2.85939	0.0543593	1
0	-1.88323	0.132378	1
0	-1.74271	0.149368	1
0	-3.6539	0.025314	1
0	-2.31107	0.0904685	1
1	-1.90921	0.129423	1
0	-2.75263	0.0601155	1
0	-1.31269	0.212562	1
0	-2.28644	0.0925157	1
0	-3.08389	0.0439084	1
0	-0.81524	0.307444	1
0	-1.91655	0.128598	1
0	-1.0548	0.258908	1
0	-2.10691	0.108731	1
0	-2.67602	0.0645931	1
1	-1.56217	0.173787	1
0	-1.95393	0.124467	1
0	-3.23439	0.0380066	1
1	-0.73565	0.324645	1
0	-1.80555	0.141558	1
0	-3.84099	0.0210857	1
0	-2.46406	0.0786436	1
0	-2.04371	0.11501	1
0	-2.601	0.0692767	1
1	-1.73387	0.150495	1
1	-0.427811	0.3954	1
0	-3.84302	0.0210439	1
0	-1.63575	0.163474	1
1	1.81028	0.859775	1
0	-4.0891	0.0165292	1
0	-1.96749	0.122997	1
0	-1.77045	0.145877	1
0	-2.3953	0.0837727	1
0	-1.69856	0.155064	1
1	0.476523	0.617669	1
0	-3.80084	0.0219306	1
0	-0.934153	0.28272	1
0	-1.14396	0.24217	1
0	-3.44347	0.0310588	1
0	-1.58388	0.170691	1
0	-0.596644	0.355832	1
0	-3.354	0.0338672	1
0	-1.88127	0.132604	1
0	-1.06837	0.256312	1
0	-2.16183	0.103522	1
0	-1.09131	0.251964	1
0	-0.580809	0.35947	1
0	-2.46183	0.0788056	1
0	-2.58996	0.0699918	1
0	-1.01697	0.266232	1
0	-3.736	0.0233653	1
0	-1.48518	0.18512	1
0	-1.97984	0.121672	1
0	-3.99471	0.0181358	1
0	-0.448031	0.390577	1
0	0.545629	0.633851	1
0	-3.15941	0.0408452	1
0	-1.66319	0.159755	1
0	1.65509	0.840001	1
0	-3.27764	0.0364565	1
0	-1.23024	0.226689	1
0	-1.6825	0.15718	1
0	-3.70228	0.0241473	1
0	-1.27429	0.219062	1
0	-1.01171	0.267259	1
0	-3.52998	0.0285581	1
0	-1.91168	0.129146	1
0	-2.03791	0.115601	1
0	-3.18752	0.0397577	1
0	-2.04554	0.114823	1
1	0.1323	0.533809	1
0	-2.09468	0.109922	1
1	-0.672533	0.338633	1
0	-1.7489	0.148584	1
0	-2.71247	0.0624251	1
1	-1.16417	0.238481	1
0	-1.46855	0.187641	1
[truncated: 1,381 more rows]
